# Supplementary material for: Gluten-Free Diet Alters the Gut Microbiome in Women with Autoimmune Thyroiditis
Source: MDPI journal article supplement (doi:10.3390/nu16050685), 2024-02-28
Supplement: s1 [file s1]

**Table S1.** Bacterial abundance after 4 weeks of gluten-free diet (T<sub>1</sub>) with test results between the gluten and the placebo groups.

| Bacteria                    | Bacterial abundance, <i>Mdn</i> (Q1 – Q3) |                             | <i>p</i> | <i>r</i> |
|-----------------------------|-------------------------------------------|-----------------------------|----------|----------|
|                             | Gluten group (n = 15)                     | Placebo group (n = 15)      |          |          |
| <i>Phylum</i>               |                                           |                             |          |          |
| Actinobacteriota            | 2657.0 (2029.5 – 3616.5)                  | 2728 (1228.5 – 3531.5)      | 0.389    | 0.16     |
| Bacteroidota                | 15386.0 (13822.0 – 18674.0)               | 16148.5 (15573.0 – 17939.0) | 0.775    | 0.06     |
| Cyanobacteria               | 185.0 (0 – 637.0)                         | 4.0 (0 – 151.5)             | 0.217    | 0.23     |
| Desulfobacterota            | 229.0 (174.5 – 490.0)                     | 335.0 (155.5 – 383.5)       | 0.967    | 0.01     |
| Firmicutes                  | 38702.0 (33183.5 – 41703.5)               | 35393.0 (30649.0 – 40745.5) | 0.539    | 0.12     |
| Fusobacteriota              | 0 (0 – 0)                                 | 0 (0 – 2.5)                 | 0.695    | 0.08     |
| Proteobacteria              | 3366.9 (1296.5 – 4634.0)                  | 2639.2 (1749.5 – 4070.5)    | 0.852    | 0.04     |
| Verrucomicrobiota           | 431.0 (249.5 – 1100.0)                    | 1273.0 (446.5 – 2138.0)     | 0.889    | 0.07     |
| <i>Family</i>               |                                           |                             |          |          |
| Prevotellaceae              | 2341.0 (8.0 – 3384.5)                     | 745.0 (2.0 – 2363.0)        | 0.632    | 0.09     |
| Veillonellaceae             | 293.0 (10.5 – 916.5)                      | 74.0 (17.0 – 390.0)         | 0.723    | 0.07     |
| Clostridiaceae              | 113.0 (29.5 – 1184.5)                     | 68.0 (11.0 – 459.5)         | 0.245    | 0.22     |
| Coriobacteriaceae           | 908.0 (330.5 – 1435.0)                    | 654.0 (300.0 – 1169.5)      | 0.468    | 0.14     |
| Enterobacteriaceae          | 101.0 (23.5 – 605.5)                      | 132.0 (35.0 – 317.0)        | 0.934    | 0.02     |
| Victivallaceae              | 22.0 (0 – 42.0)                           | 21.0 (0 – 65.0)             | 0.966    | 0.01     |
| <i>Genus</i>                |                                           |                             |          |          |
| <i>Bifidobacterium</i>      | 780.0 (416.5 – 1755.0)                    | 373.0 (229.5 – 1292.0)      | 0.300    | 0.19     |
| <i>Lactobacillus</i>        | 5.0 (0 – 33.0)                            | 2.0 (0 – 8.5)               | 0.584    | 0.10     |
| <i>Dialister</i>            | 9.0 (0 – 853.5)                           | 52.0 (0 – 390.0)            | 0.622    | 0.09     |
| <i>Prevotella</i>           | 115.0 (3.0 – 1639.5)                      | 6.0 (1 – 1585.5)            | 0.754    | 0.06     |
| <i>Alistipes</i>            | 1196.0 (1021.5 – 2189.0)                  | 1515 (892.5 – 2973)         | 0.653    | 0.09     |
| <i>Escherichia-Shigella</i> | 49.0 (7.5 – 599.0)                        | 132.0 (35.0 – 317.0)        | 0.561    | 0.11     |
| <i>Parasutterella</i>       | 65.0 (17.5 – 312.0)                       | 80.0 (30.0 – 203.5)         | 0.983    | 0.01     |
| <i>Slackia</i>              | 4.0 (0 – 455.5)                           | 16.0 (0 – 160.5)            | 1.000    | 0.00     |
| <i>Species</i>              |                                           |                             |          |          |
| <i>Escherichia coli</i>     | 49.0 (7.5 – 599.0)                        | 132.0 (35.0 – 317.0)        | 0.561    | 0.11     |
| <i>Akkermansia</i>          | 297.0 (249.5 – 994.0)                     | 852.0 (176.0 – 2105.0)      | 0.319    | 0.19     |
