# Supplementary material for: Gluten-Free Diet Alters the Gut Microbiome in Women with Autoimmune Thyroiditis
Source: MDPI journal article supplement (doi:10.3390/nu16050685), 2024-02-28
Supplement: s1 [file s1]

**Table S3.** Distribution of blood parameters after 4 weeks of gluten-free diet (T<sub>1</sub>) with test results between the gluten and placebo groups.

| Parameter          | Distribution of blood parameters, <i>M (SD)</i> <sup>1</sup> |                                | <i>p</i>     | <i>d</i> <sup>2</sup> |
|--------------------|--------------------------------------------------------------|--------------------------------|--------------|-----------------------|
|                    | Gluten group ( <i>n</i> = 15)                                | Placebo group ( <i>n</i> = 15) |              |                       |
| TSH [ $\mu$ IU/mL] | 2.08 (0.87)                                                  | 2.20 (1.27)                    | 0.774        | -0.11                 |
| FT4 [ng/dl]        | 1.27 (0.14)                                                  | 1.34 (0.25)                    | 0.337        | -0.36                 |
| FT3 [pg/ml]        | 2.81 (0.34)                                                  | 2.90 (0.33)                    | 0.455        | -0.28                 |
| Anti-TPO [IU/ml]   | 99.90 (88.0)                                                 | 190.71 (165.7)                 | 0.075        | -0.69                 |
| Anti-TG [IU/ml]    | 215.05 (187.42)                                              | 222.93 (159.23)                | 0.902        | -0.05                 |
| Glucose [mg/dl]    | 85.13 (6.16)                                                 | 91.00 (6.55)                   | <b>0.018</b> | -0.92                 |
| ESR [mm/h]         | 3.0 (2.50 – 8.00)                                            | 3.00 (2.00 – 7.50)             | 0.640        | 0.09                  |
| CRP [mg/l]         | 0.60 (0.50 – 1.50)                                           | 0.50 (0.50 – 0.70)             | 0.206        | 0.24                  |

TSH, thyroid-stimulating hormone; FT4, thyroxine; FT3, triiodothyronine; Anti-TPO, thyroid peroxidase antibodies; Anti-TG, thyroglobulin antibodies; ESR, erythrocyte sedimentation rate; CRP, C-reactive protein.

<sup>1</sup> For ESR, CRP the *Mdn (Q1 – Q3)* was reported;

<sup>2</sup> For ESR, CRP the *r* effect size was reported.
