# Supplementary material for: Gluten-Free Diet Alters the Gut Microbiome in Women with Autoimmune Thyroiditis
Source: MDPI journal article supplement (doi:10.3390/nu16050685), 2024-02-28
Supplement: s1 [file s1]

**Table S2.** Bacterial abundance after 8 weeks of gluten-free diet with 4 weeks of gluten/placebo intake (T<sub>2</sub>) with test results between groups, *N* = 29.

| Bacteria             | Bacterial abundance, <i>Mdn</i> ( <i>Q1</i> – <i>Q3</i> ) |                                | <i>p</i> | <i>r</i> |
|----------------------|-----------------------------------------------------------|--------------------------------|----------|----------|
|                      | Gluten group ( <i>n</i> = 14)                             | Placebo group ( <i>n</i> = 15) |          |          |
| <i>Phylum</i>        |                                                           |                                |          |          |
| Actinobacteriota     | 2763.0 (1767.5 – 4918.2)                                  | 3412.0 (1565.0 – 4603.0)       | 0.880    | 0.03     |
| Bacteroidota         | 16310.0 (11928.0 – 19632.5)                               | 19942.0 (15962.0 – 21380.0)    | 0.146    | 0.28     |
| Cyanobacteria        | 111.5 (3.2 – 523.0)                                       | 0.0 (0.0 – 144.0)              | 0.141    | 0.28     |
| Desulfobacterota     | 346.0 (197.5 – 517.2)                                     | 266.0 (157.0 – 369.5)          | 0.266    | 0.21     |
| Firmicutes           | 35924 (30814.8 – 41329.8)                                 | 35828 (33276.0 – 42841.5)      | 0.621    | 0.10     |
| Fusobacteriota       | 0 (0 – 0)                                                 | 0 (0 – 0)                      | 0.975    | 0.01     |
| Proteobacteria       | 3488.5 (2149.5 – 5852.2)                                  | 2496.0 (1655.0 – 4494.5)       | 0.451    | 0.15     |
| Verrucomicrobiota    | 30.0 (0 – 480.8)                                          | 109 (9.0 – 671.0)              | 0.430    | 0.15     |
| <i>Family</i>        |                                                           |                                |          |          |
| Prevotellaceae       | 1682.0 (124.2 – 33787.2)                                  | 851.0 (0.0 – 4747.5)           | 0.861    | 0.04     |
| Veillonellaceae      | 30.0 (0 – 480.8)                                          | 109.0 (9 – 671.0)              | 0.430    | 0.15     |
| Clostridiaceae       | 192.0 (108.0 – 457.0)                                     | 202 (35.5 – 695.5)             | 0.930    | 0.02     |
| Coriobacteriaceae    | 1726.5 (326.8 – 2225.0)                                   | 994.0 (454.5 – 1928.0)         | 0.533    | 0.12     |
| Enterobacteriaceae   | 1522.3 (542 – 2269.5)                                     | 1499.1 (47.5 – 427.0)          | 0.348    | 0.18     |
| Victivallaceae       | 16.5 (0 – 67.2)                                           | 20.0 (0 – 98.5)                | 0.686    | 0.08     |
| <i>Genus</i>         |                                                           |                                |          |          |
| Bifidobacterium      | 882.5 (560.2 – 1899.8)                                    | 801.0 (470.5 – 1623.0)         | 0.711    | 0.07     |
| Lactobacillus        | 280.4 (0 – 23.0)                                          | 125.3 (0 – 20.5)               | 0.766    | 0.06     |
| Dialister            | 0 (0 – 480.8)                                             | 0 (0 – 660.5)                  | 0.943    | 0.02     |
| Prevotella           | 100.5 (6.2 – 1946.5)                                      | 25.0 (0 – 3935.0)              | 0.644    | 0.09     |
| Alistipes            | 1836.5 (904.8 – 2040.2)                                   | 1125.0 (732.5 – 2637.0)        | 0.451    | 0.15     |
| Escherichia-Shigella | 489.0 (40.8 – 2268.8)                                     | 156.0 (21.5 – 392.5)           | 0.419    | 0.15     |
| Parasutterella       | 117.5 (34.8 – 280.5)                                      | 68.0 (18.5 – 230.5)            | 0.499    | 0.13     |
| Slackia              | 25.5 (0 – 229.8)                                          | 9.0 (0 – 242.0)                | 0.873    | 0.03     |
| <i>Species</i>       |                                                           |                                |          |          |
| Escherichia coli     | 489.0 (40.8 – 2096.8)                                     | 156.0 (21.5 – 392.5)           | 0.445    | 0.15     |
| Akkermansia          | 338.0 (50.2 – 2727.0)                                     | 488.0 (170.0 – 1608.5)         | 1.000    | 0        |
