# Supplementary material for: Gluten-Free Diet Alters the Gut Microbiome in Women with Autoimmune Thyroiditis
Source: MDPI journal article supplement (doi:10.3390/nu16050685), 2024-02-28
Supplement: s1 [file s1]

**Table S4.** Distribution of blood parameters after 8 weeks of gluten-free diet with 4 weeks of gluten/placebo intake (T<sub>2</sub>) with test results between groups

| Parameter          | Distribution of blood parameters, <i>M (SD)</i> <sup>1</sup> |                                     | <i>p</i>     | <i>d</i> <sup>2</sup> |
|--------------------|--------------------------------------------------------------|-------------------------------------|--------------|-----------------------|
|                    | Gluten group (n = 13)                                        | Placebo group (n = 15) <sup>3</sup> |              |                       |
| TSH [ $\mu$ IU/mL] | 2.08 (0.78)                                                  | 2.08 (1.11)                         | 0.956        | 0.02                  |
| FT4 [ng/dl]        | 1.32 (0.19)                                                  | 1.34 (0.20)                         | 0.784        | -0.11                 |
| FT3 [pg/ml]        | 2.79 (0.34)                                                  | 2.89 (0.30)                         | 0.409        | -0.32                 |
| Anti-TPO [IU/ml]   | 86.17 (69.98)                                                | 184.56 (166.99)                     | 0.051        | -0.77                 |
| Anti-TG [IU/ml]    | 236.42 (199.06)                                              | 203.81 (153.56)                     | 0.636        | 0.18                  |
| Glucose [mg/dl]    | 85.62 (4.96)                                                 | 90.67 (4.40)                        | <b>0.009</b> | -1.08                 |
| ESR [mm/h]         | 5.0 (3.00 – 9.00)                                            | 3.00 (2.00 – 5.50)                  | 0.148        | 0.28                  |
| CRP [mg/l]         | 0.60 (0.50 – 0.90)                                           | 0.50 (0.50 – 0.55)                  | 0.129        | 0.29                  |

TSH, thyroid-stimulating hormone; FT4, thyroxine; FT3, triiodothyronine; Anti-TPO, thyroid peroxidase antibodies; Anti-TG, thyroglobulin antibodies; ESR, erythrocyte sedimentation rate; CRP, C-reactive protein.

<sup>1</sup> For ESR, CRP the *Mdn (Q1 – Q3)* was reported;

<sup>2</sup> For ESR, CRP the *r* effect size was reported.

<sup>3</sup> *n* = 14 for ESR
